# Supplementary material for: Mapping Indigenous land management for threatened species conservation: An Australian case-study
Source: PLoS One. 2017 Mar 14;12(3):e0173876. doi: 10.1371/journal.pone.0173876 (PMC5349676; doi:10.1371/journal.pone.0173876)
Supplement: S1 Table — (DOCX) [file pone.0173876.s001.docx]

Supporting Information

S1 Table. Total number of overlapping threatened vertebrate species habitat ranges in each 10km2 across Indigenous lands summed within each of the 89 bioregions (species ranges that cover more than 10km2 are counted in each 10km2 grid cell they occupy).

| **IBRA** | **IBRA Full name** | | **Total number of overlapping threatened vertebrate species habitat ranges in each 10km2 of Indigenous tenure** |
| --- | --- | --- | --- |
| SEQ | South Eastern Queensland | 16534 | |
| SCP | South East Coastal Plain | 15691 | |
| NOK | Northern Kimberley | 12911 | |
| WET | Wet Tropics | 9198 | |
| SEH | South Eastern Highlands | 6710 | |
| SVP | Southern Volcanic Plain | 6535 | |
| SYB | Sydney Basin | 5694 | |
| SEC | South East Corner | 5596 | |
| BBN | Brigalow Bell North | 3474 | |
| RIV | Riverina | 3038 | |
| BBS | Brigalow Belt South | 2899 | |
| VIM | Victoria Minlands | 2821 | |
| MDD | Murray Darling Ranges | 2794 | |
| CYP | Cape York Peninsula | 2783 | |
| NCP | Naracoorte Coastal Plain | 2723 | |
| EIU | Einasleigh Uplands | 2156 | |
| VIB | Victoria Bonaparte | 1915 | |
| ARC | Arnhem Coast | 1630 | |
| DAC | Darwin Coastal | 1579 | |
| PIL | Pilbara | 1515 | |
| NNC | NSW North Coast | 1381 | |
| BHC | Broken Hill Complex | 1271 | |
| GUC | Gulf Coastal | 1178 | |
| DAL | Dampierland | 1145 | |
| AUA | Australian Alps | 1096 | |
| GFU | Gulf Fall and Uplands | 1001 | |
| GUP | Gulf Plains | 776 | |
| DRP | Darling Riverine Plains | 773 | |
| NSS | NSW South Western Slopes | 706 | |
| OVP | Old Victoria Plain | 630 | |
| ARP | Arnhem Plateau | 588 | |
| TIW | Tiwi Cobourg | 575 | |
| CEK | Central Kimberley | 559 | |
| MAC | MacDonnell Ranges | 512 | |
| PCK | Pine Creek | 482 | |
| CMC | Central Mackay Coast | 479 | |
| FLB | Flinders Lofty Block | 465 | |
| CHC | Channel Country | 403 | |
| NET | New England Tablelands | 362 | |
| ESP | Esperance Plains | 350 | |
| MGD | Mitchell Grass Downs | 343 | |
| FIN | Finke | 335 | |
| MUL | Mulga Lands | 317 | |
| MII | Mount Isa Inlier | 308 | |
| STU | Sturt Plateau | 299 | |
| STP | Stony Plains | 292 | |
| MUR | Murchison | 278 | |
| SSD | Simpson Strzelecki Dunefields | 262 | |
| GSD | Great Sandy Desert | 214 | |
| CEA | Central Arnhem | 204 | |
| DAB | Daly Basin | 189 | |
| MAL | Mallee | 179 | |
| DEU | Desert Uplands | 175 | |
| GAS | Gascoyne | 168 | |
| GVD | Great Victoria Desert | 162 | |
| GAW | Gawler | 155 | |
| CER | Central Ranges | 153 | |
| EYB | Eyre Yorke Block | 134 | |
| COO | Coolgardie | 126 | |
| DMR | Davenport Murchison Ranges | 113 | |
| TAN | Tanami | 111 | |
| BRT | Burt Plain | 102 | |
| NAN | Nandewar | 93 | |
| FUR | Furneaux | 76 | |
| TSE | Tasmanian South East | 60 | |
| SWA | Swan Coastal Plain | 56 | |
| NUL | Nullarbor | 50 | |
| LSD | Little Sandy Desert | 49 | |
| KIN | King | 45 | |
| AVW | Avon Wheatbelt | 40 | |
| CAR | Carnarvon | 35 | |
| JAF | Jarrah Forest | 34 | |
| GID | Gibson Desert | 30 | |
| COP | Cobar Peneplain | 27 | |
| HAM | Hampton | 20 | |
| GES | Geraldton Sandplains | 4 | |
| KAN | Kanmantoo | 4 | |
| WAR | Warren | 4 | |
| YAL | Yalgoo | 3 | |
| COS | Coral Sea | 0 | |
| PSI | Pacific Subtropical Islands | 0 | |
| SAI | Subantarctic Islands | 0 | |
| TWE | Tasmanian West | 0 | |
| BEL | Ben Lomond | 0 | |
| ITI | Indian Tropical Islands | 0 | |
| TCH | Tasmanian Central Highlands | 0 | |
| TNM | Tasmanian Northern Midlands | 0 | |
| TNS | Tasmanian Northern Slopes | 0 | |
| TSR | Tasmanian Southern Ranges | 0 | |
